# Supplementary material for: Characterization of heterotypic interaction effects in vitro to deconvolute global gene expression profiles in cancer
Source: Springer Nature journal article supplement (doi:10.1186/gb-2007-8-9-r191), 2007-09-14
Supplement: Additional file 2 [file gb-2007-8-9-r191-s2.pdf]

## Additional File 2

### Legend Figure A:

Expression of OAS2 was determined by quantitative RT-PCR. Expression of GAPDH was used for normalization between the samples. OAS2 was up-regulated in CCL171/MDA-MB-231 co-culture compared to these cells cultivated as monocultures.

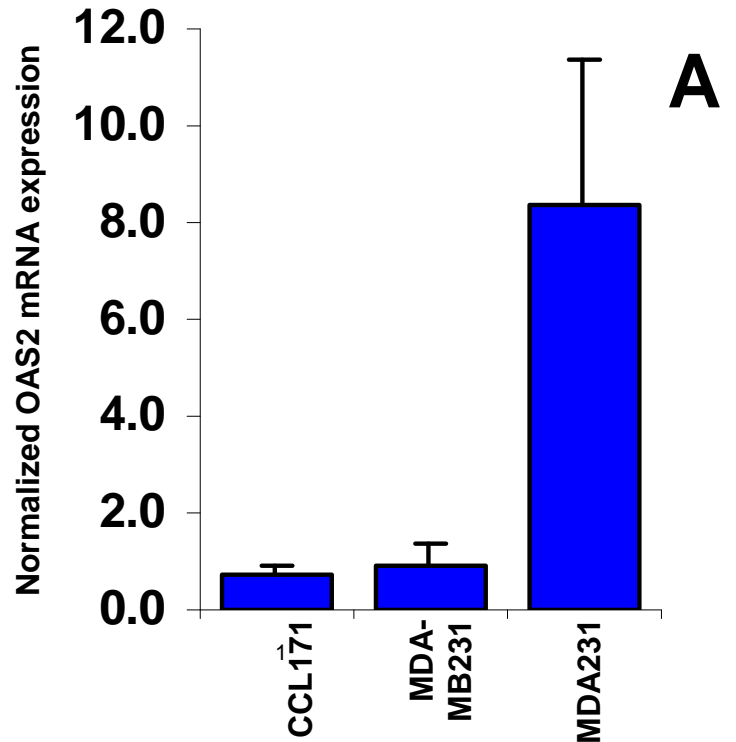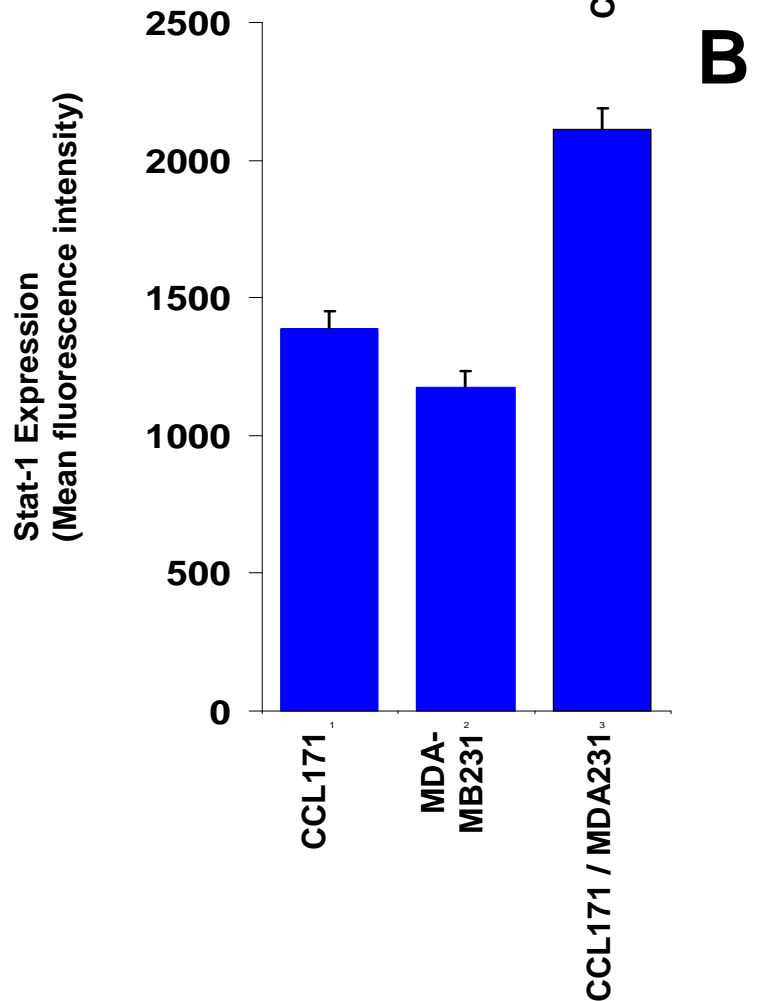

### Legend Figure B:

Expression of STAT1 determined by immunofluorescent staining and FACS analysis.
