# Supplementary material for: Characterization of heterotypic interaction effects in vitro to deconvolute global gene expression profiles in cancer
Source: Springer Nature journal article supplement (doi:10.1186/gb-2007-8-9-r191), 2007-09-14
Supplement: Additional file 3 [file gb-2007-8-9-r191-s3.pdf]

### Additional File 3

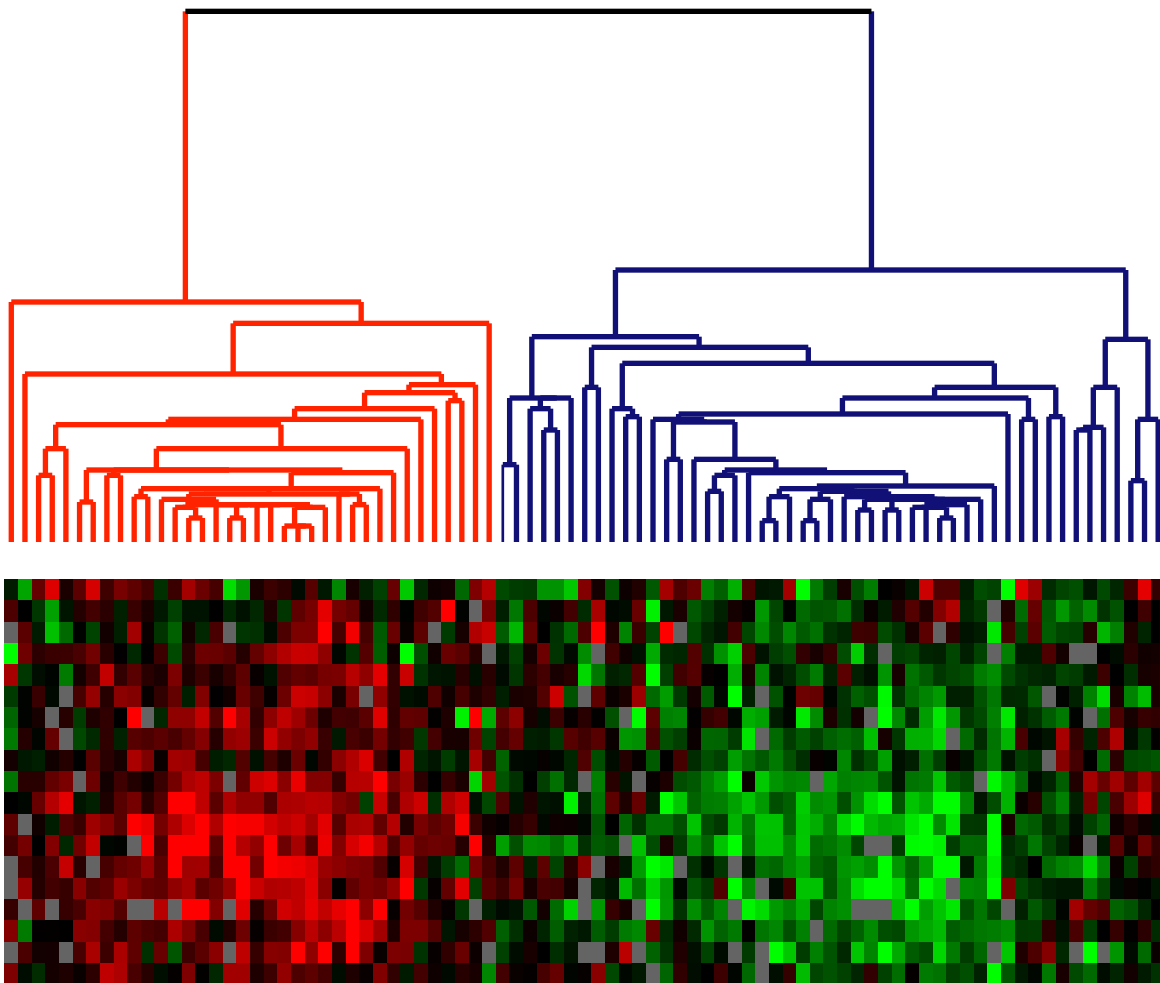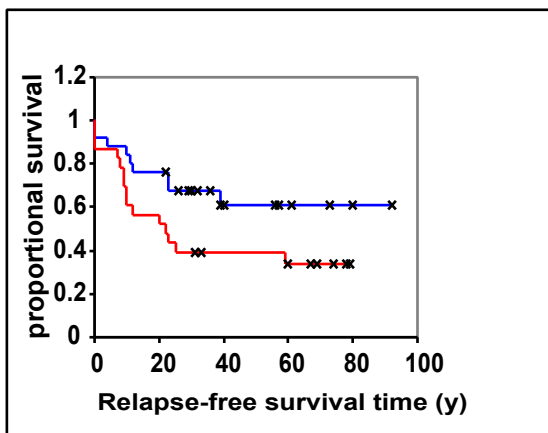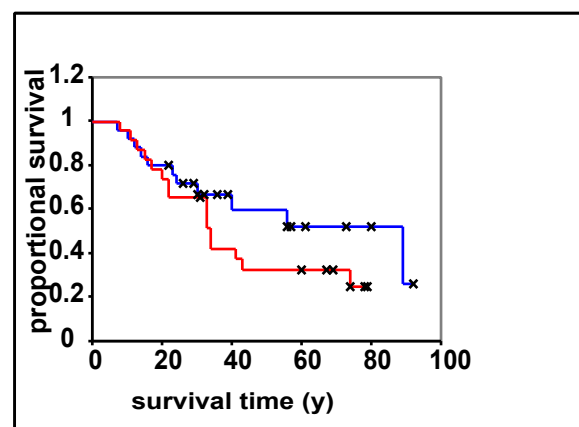

#### Legend:

The analysis of the interferon-response signature in advanced human breast cancers. Expression patterns of interferon-response genes in a group of breast carcinomas and normal breast tissue previously described in Sorlie et al.[36, 37]. Genes and samples were organized by hierarchical clustering. Kaplan-Meier survival curves for the two classes of tumors. Tumors with high transcript levels of the interferon response genes had worse relapse-free and overall survival compared to tumors with low interferon response gene expression.
